# Supplementary material for: Nano-infrared analysis of amyloid β1–42 fibrils formed in the presence of lipids with unsaturated fatty acids
Source: Royal Society of Chemistry journal article supplement (doi:10.1039/d3nr05184f), 2023-01-01
Supplement: d3nr05184f1.pdf [file d3nr05184f1.pdf]

# Nano-Infrared Analysis of Amyloid $\beta$ 1-42 Fibrils Formed in the Presence of Lipids with Unsaturated Fatty Acids

Kiryl Zhaliyazka<sup>1</sup> and Dmitry Kurouski<sup>\*1,2</sup>

1. Department of Biochemistry and Biophysics, Texas A&M University, College Station, Texas 77843, United States

2. Department of Biomedical Engineering, Texas A&M University, College Station, Texas, 77843, United States

## Supporting Information

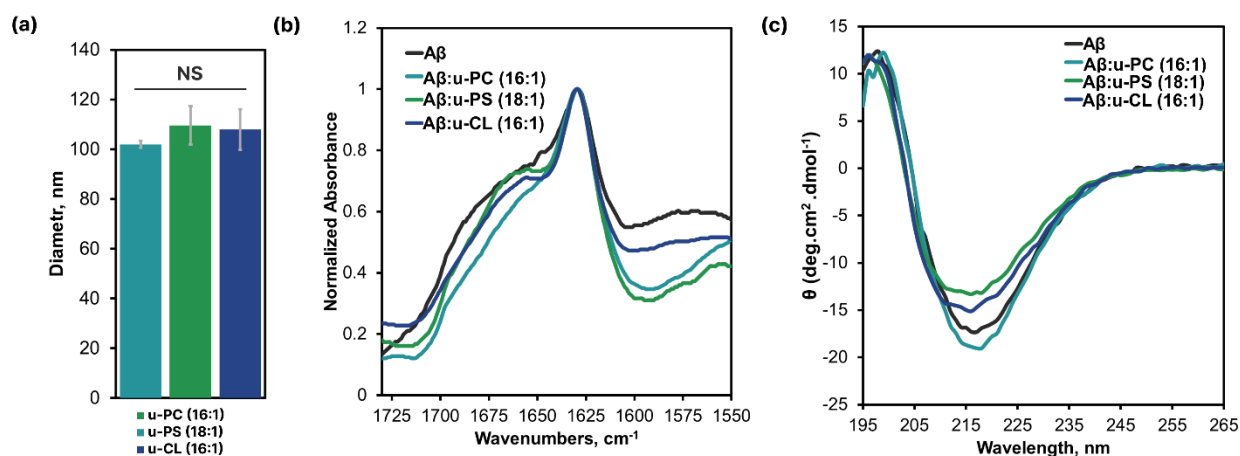

**Figure S1.** (a) Size profile of LUVs that have been used in aggregation assay with A $\beta$ <sub>1-42</sub>, data were analyzed using One-Way ANOVA showed a nonsignificant difference between samples ( $p > 0.05$ ). FTIR (b) and CD (c) spectra were collected at 48 hours time point of protein aggregation in the presence of u-PC (16:1), u-PS (18:1), and u-CL (16:1) LUVs.

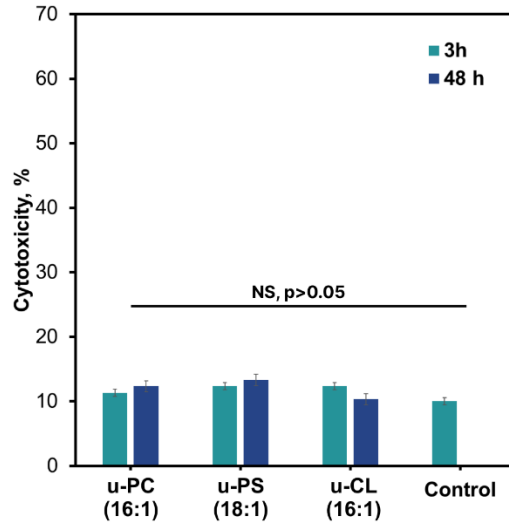

**Figure S2.** Results of LDH (lactate dehydrogenase) toxicity assay for lipids LUVs samples, showing that they are not toxic compared to control. Statistical analysis was performed using one-way ANOVA and shows nonsignificant differences for all testing groups, with  $p > 0.05$ .
